# Supplementary material for: Targeting EZH2 Promotes Chemosensitivity of BCL-2 Inhibitor through Suppressing PI3K and c-KIT Signaling in Acute Myeloid Leukemia
Source: MDPI journal article supplement (doi:10.3390/ijms231911393), 2022-09-27
Supplement: s1 [file s1]

## Supplemental Table and Figures

**Table S1 Correlation of EZH2 and PIK3IP1 expression with clinical features in AML cohort**

| Characteristics                               | EZH2 Expression (N=88) |                 | p Value      | PIK3IP1 Expression (N=88) |                   | p Value          |
|-----------------------------------------------|------------------------|-----------------|--------------|---------------------------|-------------------|------------------|
|                                               | High(n=22)             | Low(n=66)       |              | High(n=66)                | Low(n=22)         |                  |
| <b>Gender, n (%)</b>                          |                        |                 |              |                           |                   |                  |
| Male                                          | 11 (50.0%)             | 28 (42.4%)      | 0.536        | 30 (45.5%)                | 9 (40.9%)         | 0.710            |
| <b>Age, median (range), y</b>                 | 66 (24-88)             | 55 (18-82)      | <b>0.033</b> | 61 (18-88)                | 58 (24-88)        | 0.855            |
| <b>FAB subtype of AML, n (%)</b>              |                        |                 | 0.258        |                           |                   | 0.791            |
| M0                                            | 1 (4.5%)               | 1 (1.5%)        |              | 1 (1.5%)                  | 1 (4.5%)          |                  |
| M1                                            | 2 (9.1%)               | 5 (7.6%)        |              | 5 (7.6%)                  | 2 (9.1%)          |                  |
| M2                                            | 13 (59.1%)             | 28 (42.4%)      |              | 33 (50.0%)                | 8 (36.4%)         |                  |
| M3                                            | 0 (0.0%)               | 4 (6.1%)        |              | 2 (3.0%)                  | 2 (9.1%)          |                  |
| M4                                            | 1 (4.5%)               | 6 (9.1%)        |              | 5 (7.6%)                  | 2 (9.1%)          |                  |
| M5                                            | 4 (18.2%)              | 22 (33.3%)      |              | 19 (28.8%)                | 7 (31.8%)         |                  |
| M7                                            | 1 (4.5%)               | 0 (0.0%)        |              | 1 (1.5%)                  | 0 (0.0%)          |                  |
| <b>WBC (x10<sup>9</sup>/L), median(range)</b> | 7.5 (0.34-58.54)       | 13 (0.37-201.9) | 0.088        | 8 (0.34-201.9)            | 15 (0.37-179.7)   | 0.099            |
| <b>Hb (g/L), median(range)</b>                | 71 (37-118)            | 77.5 (31-123)   | 0.700        | 75 (31-120)               | 82.5 (36-123)     | 0.182            |
| <b>PLT (x10<sup>9</sup>/L), median(range)</b> | 22.5 (5-265)           | 42.5 (3-252)    | <b>0.047</b> | 38.5 (3-265)              | 39 (14-252)       | 0.795            |
| <b>BM blasts (%), median (range)</b>          | 51 (4-96)              | 60.4 (17-97.6)  | 0.221        | 58.6 (17-96)              | 56 (4.80-97.6)    | 0.658            |
| <b>Cytogenetics, n (%)</b>                    |                        |                 |              |                           |                   |                  |
| Normal                                        | 9 (47.4%)              | 36 (58.1%)      | 0.444        | 34 (45.0%)                | 11 (55.0%)        | 1.000            |
| Complex Karyotype                             | 5 (26.3%)              | 7 (11.5%)       | 0.114        | 10 (16.7%)                | 2 (10.0%)         | 0.470            |
| 7q-/7                                         | 3 (15.8%)              | 1 (1.6%)        | <b>0.013</b> | 2 (3.3%)                  | 2 (10.0%)         | 0.236            |
| <b>Gene mutations, n (%)</b>                  |                        |                 |              |                           |                   |                  |
| TP53                                          | 3 (13.6%)              | 3 (4.5%)        | 0.143        | 1 (1.5%)                  | 5 (22.7%)         | <b>0.001</b>     |
| ASXL1                                         | 2 (9.1%)               | 2 (3.0%)        | 0.237        | 3 (4.5%)                  | 1 (4.5%)          | 1.000            |
| DNMT3A                                        | 2 (9.1%)               | 15 (22.7%)      | 0.161        | 4 (6.1%)                  | 13 (59.1%)        | <b>&lt;0.001</b> |
| NPM1                                          | 1 (4.5%)               | 15(22.7%)       | 0.056        | 7 (10.6%)                 | 9 (40.9%)         | <b>0.001</b>     |
| KRAS                                          | 0 (0.0%)               | 2 (3.0%)        | 0.409        | 1 (1.5%)                  | 1 (4.5%)          | 0.440            |
| NRAS                                          | 1 (4.5%)               | 4 (6.1%)        | 0.790        | 3 (4.5%)                  | 2 (9.1%)          | 0.425            |
| FLT3-ITD                                      | 0 (0.0%)               | 8 (12.1%)       | 0.087        | 5 (7.6%)                  | 2 (9.1%)          | 0.820            |
| <b>Complete response, n (%)</b>               | 13 (59.1%)             | 57 (86.4%)      | <b>0.006</b> | 54 (81.8%)                | 16 (72.7%)        | 0.360            |
| <b>Refractory/Relapse, n (%)</b>              | 9 (45.0%)              | 14 (21.2%)      | <b>0.035</b> | 15 (23.1%)                | 8 (38.1%)         | 0.176            |
| <b>Median OS, months (95% CI)</b>             | 12.0 (1.71-22.29)      | NR              | <b>0.007</b> | 30.0                      | 20.0 (7.05-32.95) | 0.500            |

WBC, white blood cells; Hb, hemoglobin; PLT, Platelet count; BM, bone marrow; Complex karyotype, defined as having 3 or more chromosomal abnormalities in the absence of one of the WHO–designated recurrent genetic abnormalities; OS, overall survival; SE, Standard error; CI, Confidence Interval; NR, not reached.

Table S2 Clinical Features of the patients in the AML cohort

| Patient ID | FAB subtype | Gender | Age | WBC(10 <sup>9</sup> /L) | Hb(g/L) | PLT(10 <sup>9</sup> /L) | BM Blasts | Molecular features         | Cytogenetics                                                                         | Treatment response | RFS(months) | Refractory/Relapse(yes/no) | OS(months) | Survival at last follow-up(alive/died) |
|------------|-------------|--------|-----|-------------------------|---------|-------------------------|-----------|----------------------------|--------------------------------------------------------------------------------------|--------------------|-------------|----------------------------|------------|----------------------------------------|
| AML_1      | M2          | Female | 88  | 6.13                    | 71      | 74                      | 34.00%    | negative                   | Normal                                                                               | NR                 |             | no                         | 5          | died                                   |
| AML_2      | M2          | Female | 70  | 57.06                   | 80      | 21                      | 34.80%    | negative                   | t(9,22)                                                                              | NR                 |             | yes                        | 12         | died                                   |
| AML_3      | M4          | Female | 35  | 30.67                   | 123     | 62                      | 68.40%    | CBFβ/MYH11                 | 46,XX,inv(16)(p13q22)/(20)                                                           | CR                 | 29          | no                         | 30         | alive                                  |
| AML_4      |             |        |     |                         |         |                         |           |                            | 46,XX,t(8;21)(q22;q22)[1]/46,Idem,del(9)(q22)[1]/45,Idem,-X,del(9)(q22)[3]/46,XX[15] | CR                 | 53          | no                         | 54         | alive                                  |
| AML_5      | M2          | Female | 62  | 2.73                    | 80      | 46                      | 63.20%    | AML1/ETO                   | FLT3-ITD,                                                                            | CR                 |             |                            |            |                                        |
| AML_5      | M2          | Female | 49  | 20.47                   | 76      | 33                      | 40.40%    | NPM1                       | Normal                                                                               | NR                 | 38          | no                         | 42         | alive                                  |
| AML_6      | M5          | Female | 55  | 6.58                    | 65      | 102                     | 31.20%    | NPM1, CEBPA                | Normal                                                                               | CR                 | 6           | no                         | 5          | alive                                  |
| AML_7      | M5          | Female | 54  | 44.98                   | 121     | 116                     | 61.60%    | DNMT3A                     | Normal                                                                               | CR                 | 60          | no                         | 61         | alive                                  |
| AML_8      |             |        |     |                         |         |                         |           | HOX11 rearrangement, NPM1, |                                                                                      |                    |             |                            |            |                                        |
| AML_8      | M5          | Female | 81  | 44.24                   | 102     | 79                      | 60%       | DNMT3A                     | Normal                                                                               | NR                 | 10          | yes                        | 16         | died                                   |
| AML_9      | M4          | Female | 56  | 47.7                    | 65      | 25                      | 53.20%    | FLT3-ITD                   | Normal                                                                               | CR                 | 29          | yes                        | 36         | alive                                  |
| AML_10     | M1          | Male   | 49  | 179.7                   | 99      | 63                      | 97.60%    | FLT3-ITD, NPM1             | Normal                                                                               | PR                 | 11          | no                         | 15         | died                                   |
| AML_11     | M5          | Female | 61  | 58.54                   | 100     | 22                      | 59.20%    | negative                   | Normal                                                                               | CR                 | 1           | no                         | 1          | alive                                  |
| AML_12     | M3          | Female | 45  | 0.37                    | 63      | 20                      | 61.20%    | PML/RARα                   | t(15,17)                                                                             | CR                 |             | no                         | 52         | alive                                  |
| AML_13     | M2          | Male   | 68  | 3.92                    | 86      | 265                     | 31.20%    | IDH2                       | 46,XY,del(7)(q31)[12]/46,XY[5]                                                       | PR                 | 2           | no                         | 6          | alive                                  |
| AML_14     | M2          | Male   | 48  | 18.24                   | 87      | 18                      | 46%       | HOX11/EVI1, NPM1           | Normal                                                                               | CR                 | 21          | yes                        | 32         | alive                                  |
| AML_15     | M2          | Female | 41  | 122.12                  | 49      | 18                      | 62.40%    | FLT3-ITD                   | 46,XX,del(20)(q13)[20]                                                               | NR                 |             | yes                        | 2          | alive                                  |
| AML_16     | M5          | Female | 48  | 32.81                   | 109     | 37                      | 85.60%    | CBFβ/MYH11                 | 46, XX, ? add(7)(q11.2), inv(16)(p13q22)[20]                                         | CR                 | 46          | no                         | 47         | alive                                  |
| AML_17     | M5          | Female | 82  | 11.62                   | 107     | 10                      | 65.60%    | CEBPA                      | Normal                                                                               | PR                 | 1           | no                         | 1          | alive                                  |
| AML_18     | M2          | Male   | 75  | 201.9                   | 96      | 36                      | 89%       | negative                   | Normal                                                                               | PR                 |             | yes                        | 2          | died                                   |
| AML_19     | M5b         | Female | 73  | 108.15                  | 95      | 42                      | 65.60%    | FLT3-ITD, NPM1             | Normal                                                                               | NR                 | 1           | yes                        | 1          | died                                   |
| AML_20     | M0          | Male   | 55  | 25.66                   | 82      | 31                      | 76%       | RUNX1                      | Normal                                                                               | PR                 | 2           | no                         | 2          | alive                                  |
| AML_21     | M2          | Female | 88  | 8.47                    | 81      | 14                      | 24%       | negative                   | Normal                                                                               | PR                 | 1           | no                         | 3          | died                                   |
| AML_22     | M2          | Male   | 64  | 2.99                    | 83      | 63                      | 26%       | negative                   | 47, XY, +1, der(1;19)(q10;q10),+19[19]/46,XY[1]                                      | NR                 | 7           | no                         | 8          | died                                   |
| AML_23     | M4          | Female | 44  | 132.28                  | 82      | 37                      | 54.80%    | FLT3-ITD                   | Normal                                                                               | CR                 | 1           | no                         | 2          | alive                                  |
| AML_24     | M3          | Female | 25  | 0.8                     | 74      | 93                      | 55.20%    |                            | 47, XX, +8, t(15;17)(q22;q21)[14]/46,XX[6]                                           | CR                 |             | no                         | 27         | alive                                  |
| AML_25     | M3          | Female | 50  | 52.67                   | 71      | 82                      | 93.30%    | PML-RARα                   | t(15,17)                                                                             | CR                 | 17          | no                         | 18         | alive                                  |
| AML_26     | M5          | Male   | 75  | 39.54                   | 57      | 39                      | 36.40%    | SRSF2                      | 46,XY,del(20)(q11)[11]/47,idem,+8[9]                                                 | CR                 | 2           | no                         | 2          | died                                   |
| AML_27     | M5          | Female | 69  | 52.02                   | 100     | 159                     | 65.60%    | DNMT3A, TET2               | Normal                                                                               | CR                 | 11          | no                         | 12         | died                                   |
| AML_28     | M1          | Male   | 56  | 52.16                   | 72      | 23                      | 90.40%    | negative                   | 46, XY, add(21)(p11) [6]/46,XY[14]                                                   | CR                 | 18          | yes                        | 16         | died                                   |
| AML_29     | M4          | Male   | 25  | 47.48                   | 72      | 50                      | 49.20%    | CBFβ/MYH11                 | 46,XY,inv(16)(p13q22)[20]                                                            | CR                 | 37          | no                         | 38         | alive                                  |
| AML_30     | M5          | Male   | 67  | 0.86                    | 56      | 26                      | 33.20%    | ASXL1, BCOR                | Normal                                                                               | NR                 | 1           | no                         | 2          | alive                                  |
|            |             |        |     |                         |         |                         |           | IDH, RUNX1                 |                                                                                      |                    |             |                            |            |                                        |

Table S2 Clinical Features of the patients in the AML cohort (continue1)

| Patient ID | FAB subtype | Gender | Age | WBC(10Hb(g/PLT(10 <sup>9</sup> / <sup>9</sup> L/L) |     |    | BM Blasts | Molecular features        | Cytogenetics                                            | Treatment response | RFS(months) | Refractory/Relapse(yes/no) | OS(months) | Survival at last follow-up(alive/died) |
|------------|-------------|--------|-----|----------------------------------------------------|-----|----|-----------|---------------------------|---------------------------------------------------------|--------------------|-------------|----------------------------|------------|----------------------------------------|
| AML_31     | M0          | Female | 60  | 35.48                                              | 53  | 15 | 48.80%    | CBFβ/MYH11, NRAS          | t(8,10); inv(16)                                        | CR                 | 4           | no                         | 5          | alive                                  |
| AML_32     | M2          | Male   | 67  | 2.35                                               | 99  | 51 | 62.80%    | TET2                      | Normal                                                  | CR                 | 25          | yes                        | 30         | died                                   |
| AML_33     | M2          | Male   | 42  | 154.9                                              | 82  | 33 | 72.80%    | FLT3, CBFβ/MYH11          | 46,XY,inv(16)(p13q22)[3]/47,idem,+22[15]/46,XY[2]       | CR                 | 13          | no                         | 14         | died                                   |
| AML_34     | M2          | Female | 55  | 7.23                                               | 83  | 62 | 54.80%    | TET2, STAG2, CEBPA        | Normal                                                  | CR                 | 38          | no                         | 39         | alive                                  |
| AML_35     | M2          | Male   | 78  | 0.34                                               | 69  | 20 | 75.60%    | RUNX1, SF3B1              | No mitotic phase                                        | NR                 |             |                            | 1          | died                                   |
| AML_36     | M2          | Female | 62  | 1.8                                                | 118 | 79 | 30.88%    | WT1 high expression       | Normal                                                  | CR                 | 17          | yes                        | 26         | died                                   |
| AML_37     | M2          | Male   | 24  | 4.41                                               | 65  | 5  | 77.60%    | AML1/ETO                  | No mitotic phase                                        | CR                 | 2           | no                         | 3          | alive                                  |
| AML_38     | M2          | Female | 75  | 15.17                                              | 90  | 23 | 22.60%    | AML1/ETO                  | 45, X,-X,t (8 ; 21) (q22 ; q22) [20]                    | CR                 | 14          | yes                        | 92         | alive                                  |
| AML_39     | M2          | Female | 40  | 13.6                                               | 44  | 17 | 70.80%    | GATA2                     | No mitotic phase                                        | CR                 | 1           | yes                        | 30         | died                                   |
| AML_40     | M2          | Female | 66  | 3.29                                               | 61  | 19 | 27.50%    | negative KIT,             | Normal                                                  | CR                 | 2           | no                         | 3          | died                                   |
| AML_41     | M2          | Male   | 44  | 33.13                                              | 68  | 15 | 75.60%    | AML1/ETO                  | Normal                                                  | CR                 | 5           | no                         | 6          | alive                                  |
| AML_42     | M2          | Female | 35  | 10.37                                              | 82  | 24 | 32.80%    | AML1/ETO                  | 46, XX, t(8 ; 21) (q22 ; q22) [10]                      | CR                 | 8           | yes                        | 15         | died                                   |
| AML_43     | M2          | Male   | 67  | 12.43                                              | 70  | 23 | 53.20%    | TET2                      | Normal                                                  | PR                 |             | yes                        | 13         | died                                   |
| AML_44     | M2          | Female | 24  | 26.66                                              | 36  | 23 | 55.20%    | WT1 high expression       | 46,XX,?del(9)(q22)[9]/46,XX[11]                         | CR                 | 33          | no                         | 34         | alive                                  |
| AML_45     | M3          | Female | 54  | 0.87                                               | 67  | 85 | 69.5%     | PML/RARα                  | t (15,17)                                               | CR                 | 17          | no                         | 18         | alive                                  |
| AML_46     | M5b         | Female | 53  | 69.32                                              | 53  | 30 | 46.80%    | TET2, WT1, KRAS           | Normal                                                  | CR                 | 18          | no                         | 20         | died                                   |
| AML_47     | M2          | Female | 50  | 1.08                                               | 89  | 45 | 63.50%    | IDH2, CEBPA               | No mitotic phase                                        | CR                 | 14          | yes                        | 34         | alive                                  |
| AML_48     | M2          | Female | 48  | 14.43                                              | 31  | 3  | 60.80%    | AML1/ETO, KIT             | 46,XX,inv(8)(p23q21),t(8;21)(q22;q22)[11]/47,idem,+4[4] | CR                 | 13          | no                         | 14         | alive                                  |
| AML_49     | M4          | Female | 43  | 62.12                                              | 81  | 43 | 75.50%    | CBFβ/MYH11, KIT, FLT3     | 47,XX,inv(16)(p13q21),+22[20]                           | CR                 | 18          | no                         | 19         | alive                                  |
| AML_50     | M5          | Female | 34  | 0.81                                               | 64  | 25 | 87.60%    | U2AF1, SETBP1             | 46,X,del(X)(q24),t(9;11)(p22;q23),?add(17)(q25)         | NR                 | 22          | no                         | 27         | alive                                  |
| AML_51     | M2          | Female | 48  | 2.19                                               | 89  | 78 | 17%       | IDH1, TET2                | No mitotic phase                                        | CR                 | 19          | no                         | 20         | alive                                  |
| AML_52     | M2          | Male   | 43  | 1.6                                                | 62  | 43 | 23%       | RUNX1, U2AF1, BCOR        | Normal                                                  | CR                 | 8           | no                         | 15         | died                                   |
| AML_53     | M2          | Female | 21  | 6.72                                               | 68  | 18 | 44%       | GATA2, CEBPA              | Normal                                                  | CR                 | 18          | no                         | 19         | alive                                  |
| AML_54     | M5          | Male   | 79  | 4.12                                               | 78  | 54 | 46.40%    | TET2, DNMT3A              | Normal                                                  | CR                 | 4           | no                         | 6          | died                                   |
| AML_55     | M2          | Male   | 72  | 2.37                                               | 72  | 86 | 63.20%    | TET2                      | Normal                                                  | CR                 | 15          | no                         | 18         | died                                   |
| AML_56     | M1          | Female | 75  | 47.99                                              | 71  | 53 | 54.40%    | DNMT3A, TET2              | Normal                                                  | NR                 | 5           | yes                        | 5          | died                                   |
| AML_57     | M7          | Male   | 65  | 5.4                                                | 64  | 70 | 34.80%    | TP53                      | Complex Karyotype                                       | PR                 | -           | yes                        | 1          | died                                   |
| AML_58     | M5b         | Male   | 54  | 36.11                                              | 120 | 62 | 52%       | KRAS                      | Normal                                                  | CR                 | 16          | no                         | 17         | alive                                  |
| AML_59     | M5          | Female | 66  | 1.39                                               | 66  | 24 | 58%       | DNMT3A, IKZF1, IDH2, BCOR | Normal                                                  | CR                 | 5           | no                         | 6          | alive                                  |
| AML_60     | M2          | Male   | 78  | 4.21                                               | 89  | 15 | 64.80%    | ASXL1, IDH2, RUNX1, PHF6  | Normal                                                  | PR                 |             | yes                        | 3          | died                                   |

Table S2 Clinical Features of the patients in the AML cohort (continue2)

| Patient ID | FAB subtype | Gender | Age | WBC(10 <sup>9</sup> Hb(g/ <sup>9</sup> L)/L) | PLT(10 <sup>9</sup> BM Blasts | Molecular features | Cytogenetics                                                                                                                                                     | Treatment response                                                                                                                                                 | RFS(months) | Refractory/Relapse(yes/no) | OS(months) | Survival at last follow-up(alive/died) |       |
|------------|-------------|--------|-----|----------------------------------------------|-------------------------------|--------------------|------------------------------------------------------------------------------------------------------------------------------------------------------------------|--------------------------------------------------------------------------------------------------------------------------------------------------------------------|-------------|----------------------------|------------|----------------------------------------|-------|
| AML_61     | M2          | Female | 75  | 11.43                                        | 95                            | 43 77.00%          | TP53, IDH2                                                                                                                                                       | 43~45,X,-X,idic(11)(p11),-14,-15,-16,-17,-18,+4~6mar,inc[cp6]/46,XX[5] ; FISH:7q-/7 : 3%,+8 : 9%,17p- : 94.5% , -17 : 18.7%,                                       | NR          |                            |            |                                        |       |
| AML_62     | M4          | Male   | 48  | 6.63                                         | 37                            | 11 23.50%          | ZRSR2                                                                                                                                                            | 46, XY,inv (3) (q21q26)[6]/46,XY[4]                                                                                                                                | PR          | 9                          | yes        | 15                                     | alive |
| AML_63     | M2          | Male   | 59  | 7.98                                         | 54                            | 21 67.20%          | KIT, ASXL1, AML1/ETO                                                                                                                                             | 46, XY, t (8 ; 21) (q22 ; q22)[20]                                                                                                                                 | CR          | 2                          | no         | 4                                      | died  |
| AML_64     | M1          | Male   | 47  | 23.36                                        | 85                            | 67 96%             | IDH1, FLT3, TP53                                                                                                                                                 | Normal                                                                                                                                                             | CR          | 2                          | no         | 3                                      | alive |
| AML_65     | M5          | Female | 64  | 1.22                                         | 61                            | 20 40.00%          | TP53, PTPN11, ASXL2                                                                                                                                              | 46, XXdel(1)(p11p12),del(5)(q13q33)+8,add(9)(q34),+11,der(17;20)(q10;p10),-18[20]                                                                                  | NR          | 1                          | yes        | 6                                      | alive |
| AML_66     | M5a         | Female | 70  | 25.98                                        | 79                            | 88 85.20%          | PTPN11, MLL/AF9                                                                                                                                                  | 47, XX,+8[20]                                                                                                                                                      | CR          | 4                          | no         | 24                                     | alive |
| AML_67     | M4          | Male   | 41  | 9.59                                         | 66                            | 36 53.60%          | CSF3R, WT1, CBFβ/MYH11                                                                                                                                           | Normal                                                                                                                                                             | CR          | 23                         | no         | 24                                     | alive |
| AML_68     | M2          | Male   | 48  | 10.6                                         | 77                            | 23 63.20%          | DNMT3A                                                                                                                                                           | Normal                                                                                                                                                             | CR          | 2                          | no         | 5                                      | died  |
| AML_69     | M5          | Male   | 57  | 4.8                                          | 75                            | 67 24.40%          | TP53                                                                                                                                                             | 43-48, XY,+X,psu dic(5;3)(q35;p21),-7,add(11)(q13),-12,-13,add(17)(p13),+2~3mar[20]                                                                                | CR          | 6                          | no         | 7                                      | died  |
| AML_70     | M1          | Female | 70  | 7.68                                         | 97                            | 12 89%             | WT1                                                                                                                                                              | Normal                                                                                                                                                             | CR          | 15                         | no         | 17                                     | alive |
| AML_71     | M5          | Female | 18  | 0.4                                          | 36                            | 25 54.40%          | negative                                                                                                                                                         | No mitotic phase                                                                                                                                                   | CR          | 26                         | no         | 28                                     | alive |
| AML_72     | M2          | Male   | 73  | 0.69                                         | 42                            | 29 34.80%          | ETV6                                                                                                                                                             | 46,XY[20], 17p- 6.5%                                                                                                                                               | CR          | 21                         | no         | 22                                     | alive |
| AML_73     | M5          | Male   | 78  | 73.87                                        | 91                            | 90 49.60%          | DNMT3A, TET2, NPM1                                                                                                                                               | Normal                                                                                                                                                             | CR          | 3                          | no         | 6                                      | died  |
| AML_74     | M2          | Male   | 74  | 8.28                                         | 119                           | 66 53.20%          | DNMT3A, CEBPA                                                                                                                                                    | Normal                                                                                                                                                             | CR          | 11                         | no         | 12                                     | alive |
| AML_75     | M2          | Male   | 71  | 5.61                                         | 84                            | 105 56.80%         | DNMT3A, TET2, NPM1, FLT3-ITD                                                                                                                                     | No mitotic phase                                                                                                                                                   | CR          | 7                          | no         | 8                                      | died  |
| AML_76     | M1          | Male   | 73  | 7.71                                         | 68                            | 50 92.80%          | TET2, DNMT3A, NPM1                                                                                                                                               | Normal                                                                                                                                                             | CR          | 16                         | no         | 17                                     | alive |
| AML_77     | M2b         | Female | 26  | 33.55                                        | 56                            | 37 48.80%          | AML1/ETO, PTEN, ASXL1, CSF3R                                                                                                                                     | 46,XX, t (8 ; 21) (q22 ; q22)[19]/46,XX[1], RUNX1/RUNX1T1+:99%                                                                                                     | CR          | 2                          | no         | 3                                      | alive |
| AML_78     | M5          | Male   | 70  | 10.2                                         | 101                           | 252 44%            | DNMT3A, NPM1, IDH1, NRAS                                                                                                                                         | Normal                                                                                                                                                             | CR          | 1                          | no         | 2                                      | died  |
| AML_79     | M2          | Female | 69  | 7.79                                         | 55                            | 121 20.40%         | RAD21, AML1/ETO                                                                                                                                                  | 45,X,t (8 ; 21) (q22 : q22)[17]/46,XX[3]                                                                                                                           | CR          | 6                          | no         | 7                                      | alive |
| AML_80     | M1          | Female | 75  | 5.12                                         | 75                            | 21 81.00%          | DNMT3A, TET2CEBPA:NM_004364.4: exon1:c.1042_1043dupCT:p.Ser348ArgfsTer75 38.78% 移码突变 ; CEBPA: NM_004364.4:exon1:c.484C>T:p.Q162X 38.85% 无义突变 ; WT1/ABL1 0.250% ; | 46, XX,del(11)(q14)[12]/47,idem,+?8[2]/46,XX[2]                                                                                                                    | CR          | 1                          | no         | 2                                      | alive |
| AML_81     | M5b         | Male   | 64  | 20.66                                        | 58                            | 28 27.60%          | SF3B1, FLT3-ITD, RUNX1                                                                                                                                           | Normal                                                                                                                                                             | CR          | 17                         | no         | 18                                     | alive |
| AML_82     | M2          | Female | 64  | 1.71                                         | 92                            | 109 62.00%         | NPM1, IDH1, DNMT3A                                                                                                                                               | Normal                                                                                                                                                             | CR          | 2                          | no         | 3                                      | alive |
| AML_83     | M5b         | Female | 73  | 101.82                                       | 109                           | 38 76.31%          | TET2, GATA1, NRAS, NPM1                                                                                                                                          | 46, XX, +1, psu dic(4;1)(p16;p11)[9]/46,XX[1]                                                                                                                      | NR          |                            | yes        | 2                                      | alive |
| AML_84     | M2          | Male   | 63  | 1.54                                         | 62                            | 99 76.00%          | TET2, DNMT3A, NPM1                                                                                                                                               | Normal                                                                                                                                                             | CR          | 10                         | no         | 11                                     | alive |
| AML_85     | M2          | Male   | 71  | 6.38                                         | 60                            | 54 48.00%          | TP53                                                                                                                                                             | 42,X,-Y,t(2;2)(p24;p13),del(3)(q26.2),inv(4)(p16q12),del(5)(q23),+11,der(11;14)(q10;q10),-17,-18,del(20)(q12),-21[20]                                              | CR          | 4                          | no         | 6                                      | died  |
| AML_86     | M5b         | Male   | 59  | 95.6                                         | 78                            | 68 80.40%          | DNMT3A, NPM1, IDH2, NRAS                                                                                                                                         | Normal                                                                                                                                                             | CR          | 9                          | no         | 10                                     | alive |
| AML_87     | M5b         | Female | 53  | 11.88                                        | 97                            | 85 77.00%          | CBL, NPM1                                                                                                                                                        | No mitotic phase                                                                                                                                                   | CR          | 3                          | yes        | 8                                      | alive |
| AML_88     | M5a         | Male   | 69  | 9.25                                         | 116                           | 140 96.00%         | WT1 high expression                                                                                                                                              | 47~48, XY, del(1)(q32), del(5)(q15q31),-7,add(9)(p13),-12,+19,-22,+2~3mar[cp4]/46,XY ,del(5)(q15q31),-7,-19,-22,+mar1,+mar2,+mar3[3]/46XY [13] 。 5q-:65%,7q-/7 94% | PR          |                            | yes        | 4                                      | died  |

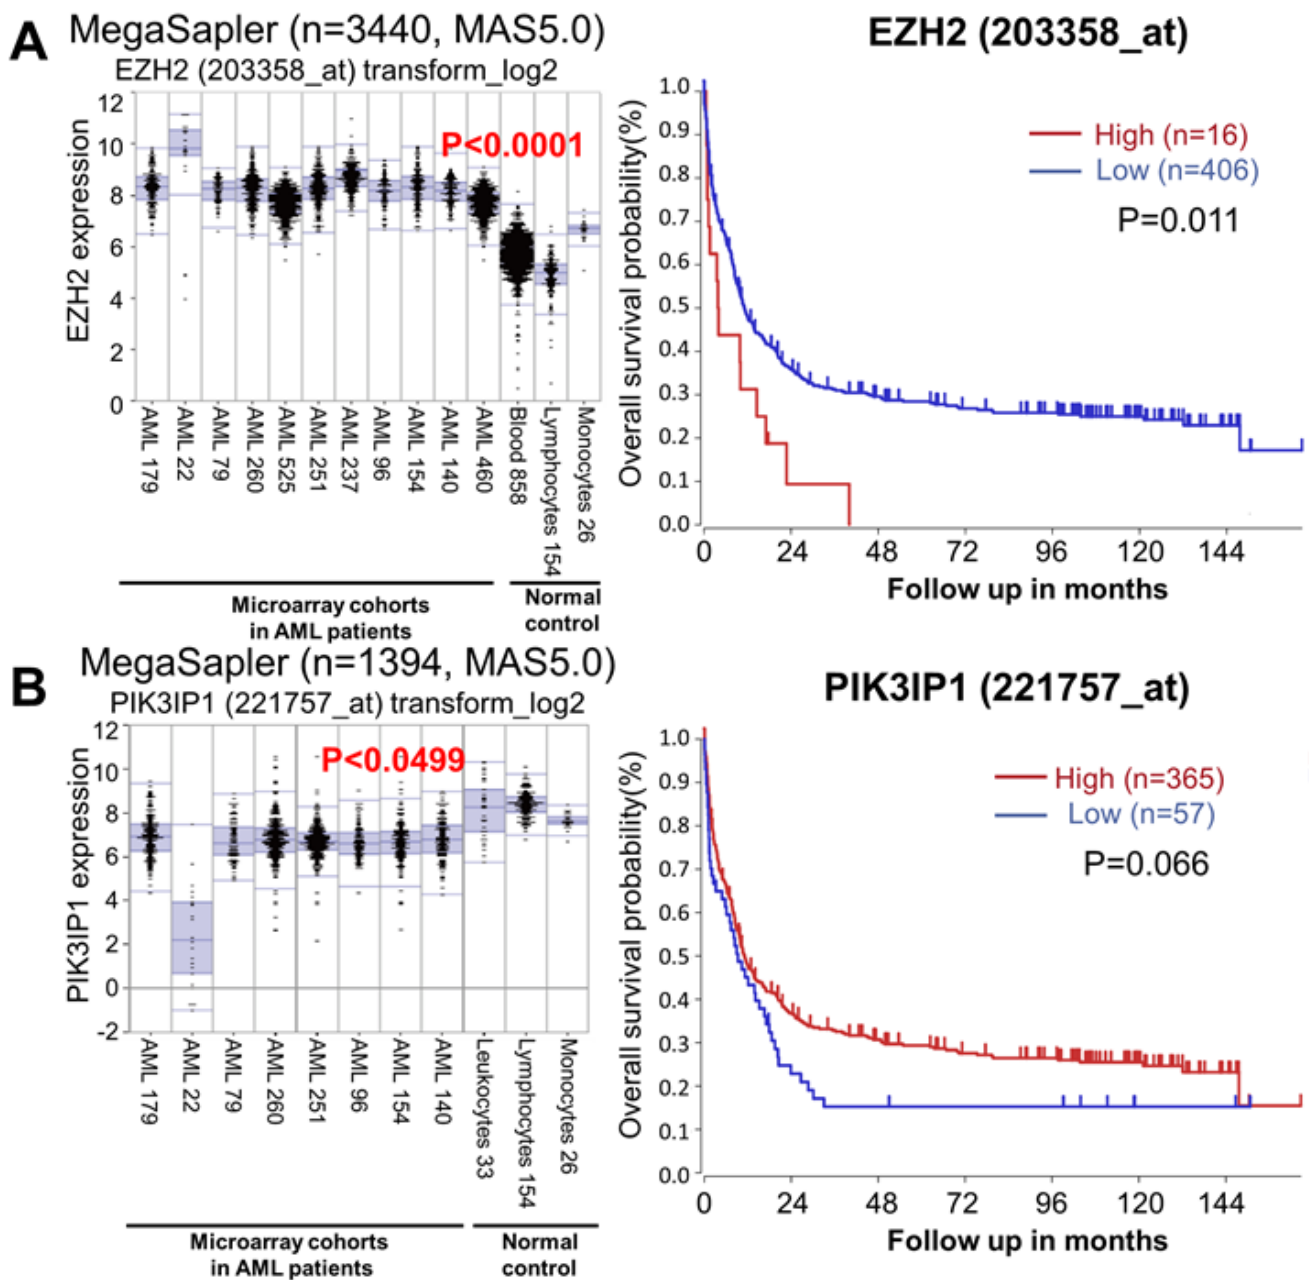

**Figure S1. Expression of EZH2 or PIK3IP1 in blood or bone marrow samples of AML patients Versus normal controls from MegaSapler dataset and their association with survival.** (A, B) The mRNA level of EZH2 is upregulated (A, left panel) while PIK3IP1 is downregulated (B, left panel) in AML cohorts compared to that of normal control. Association of EZH2<sup>lower</sup> or PIK3IP1<sup>higher</sup> with a longer OS compared to EZH2<sup>Higher</sup> or PIK3IP1<sup>Lower</sup> (A & B, right panel).

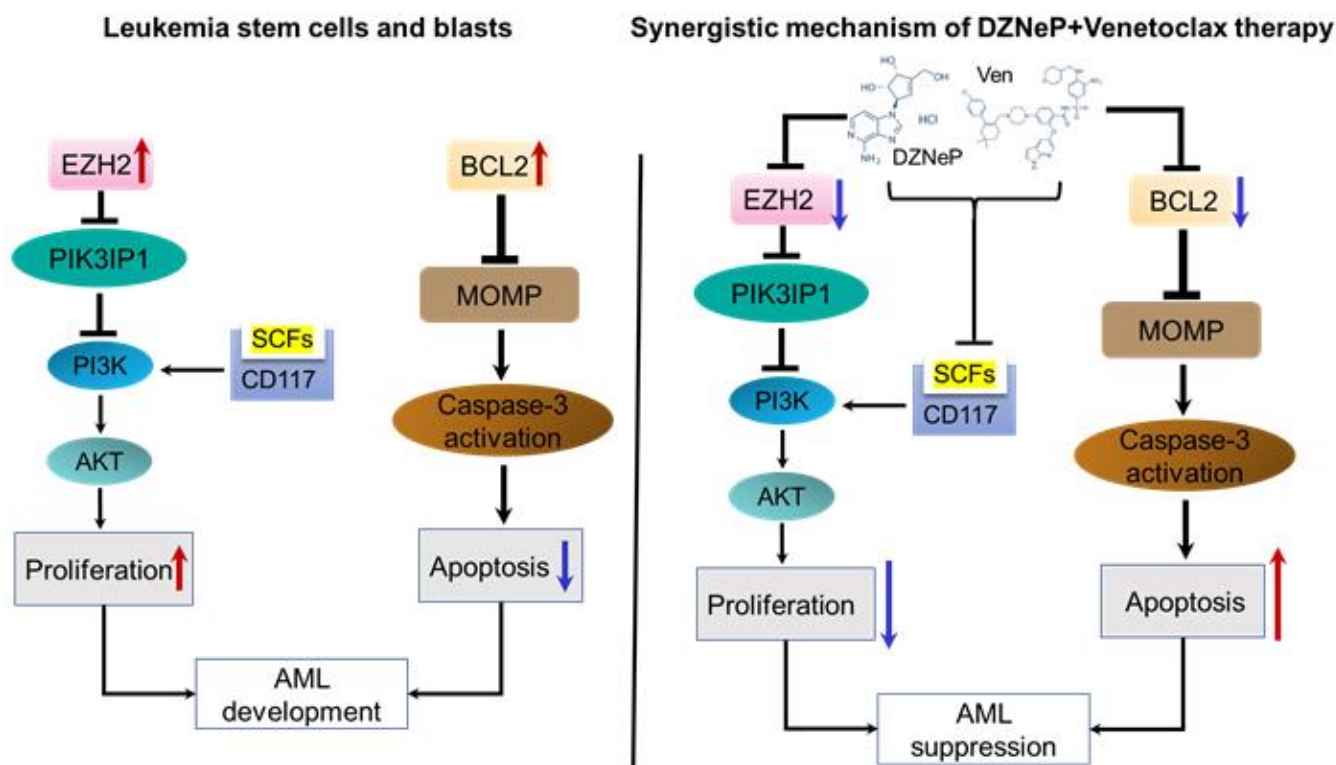

**Figure S2. Mechanism model for the synergistic anti-leukemic effect of DZNeP+Ven in AML.** In leukemia cells, highly expressed EZH2 and BCL2 promote the proliferation of AML cells and suppress apoptosis through activation of PI3K/AKT signaling. CD117 (c-KIT) is also activated through PI3K/AKT signaling. DZNeP treatment increases the expression of PIK3IP1, the PI3K/AKT signaling suppressor, which causes a significant proliferation arrest; and Ven induces apoptosis through promoting MOMP. Combination treatment of DZNeP+Ven shows the synergistic effects of proliferation arrest and apoptosis through enhancing expression of PIK3IP1 and decreasing c-KIT in AML. (Abbreviation: SCFs, stem cell factors; MOMP, mitochondrial outer membrane permeabilization)
